# Supplementary material for: A Case-Series of Reflective Family Play: Therapeutic Process, Feasibility, and Referral Characteristics
Source: Springer Nature journal article supplement (doi:10.1007/s10826-018-1192-3), 2018-08-08
Supplement: MOESM1 [file 16021826]

**Operational Definitions of Coded Variables**

**Presenting concerns**

The following child symptoms/concerns were coded: Tantrums, aggression, sleeping, feeding, bonding or attachment, separation anxiety, anxiety, transitions, oppositionality, mood, attention, hyperactivity, tics, somatic complaints, sensory sensitivities, enuresis, peer difficulties and sibling difficulties. Whether parents reported their child’s difficulties as problematic at home, at school, or both, was also coded. Parent difficulties coded for included: low mood/depression, anxiety, frustration (i.e., feeling overwhelmed and frustrated with their family’s/child’s difficulties), and coparenting difficulties. Child and parent concerns were coded using a yes, no, or not indicated/unclear format.

**Attendance**

The number of RFP sessions attended by a family and any issues around attendance (e.g., cancelled appointments and no-shows, as well as details about the reasons for missed sessions) were noted.

**Concerns with modality**

We collected information about the specifics of any concerns parents voiced to their clinicians about RFP (open text field) and documented when the concerns were shared (i.e., at which session).

**Maintaining the RFP structure**

A session-by-session variable noting if the family progressed through all four parts of the play and participated in a discussion, using a yes, no, or not indicated/unclear format. We coded this variable whenever each of the four parts and the discussion were clearly described in a session note. Typically, when one or more parts were skipped by a family, this was clearly noted by the clinician and coded as “no.”

**Transitions**

Difficulties with getting started or transitioning from one part of the session to the next were coded for, session-by-session. Coding levels included: yes, significant difficulties with transitions; yes, some difficulties with transitions; smooth transitions; or not indicated/unclear. Significant difficulties were defined as disruptions to two or more of the transitions, while the “some difficulties” classifier was used if there was one instance of difficulty with transitions but the rest of the session progressed smoothly. Details about who initiated transitions and any difficulties were noted qualitatively (open text field).

**Following child’s lead**

How well both parents followed their child’s lead during each session was coded. This was defined as a parent’s ability to observe their child and participate in the child’s activity without interrupting it or introducing their own ideas about how the child should play. How well each parent followed their child’s lead was coded using a failed to follow, followed somewhat, followed well, not indicated/unclear format. If a clinician noted that a parent was able to follow their child's lead throughout the session, the parent was coded as following well. If the parent followed the child’s lead inconsistently, they were said to have followed their child’s lead somewhat. Difficulties with following the child’s lead were recorded when it was explicitly stated by the clinician that the parent had difficulties or when it was apparent in the session note (e.g., the parent redirected the child’s play several times).

**Simply present**

We coded if either or both parents had difficulties remaining simply present (defined as attending to and resonating with the play, without intruding or excluding oneself completely). Coding levels captured if both parents struggled to remain simply present, if one parent was successfully simply present, or if both parents were able to be simply present. As with all other variables, a “not indicated/unclear” option was used when there was not enough information to code a session note. Difficulties with remaining simply present were either identified explicitly in session notes (e.g., “dad struggled to remain simply present”), or indirectly through clinicians’ descriptions of the play (e.g., “when mom and child were playing with the dinosaurs, dad interrupted from the sidelines”).

**Sibling Relationship**

We coded for instances of sibling conflict during sessions. Coding levels captured if the therapist described a great deal of sibling conflict (defined as conflict that interrupted family play or got in the way of transitions, or if much of the session involved sibling conflict), some conflict (if one or two instances were described), or if there was no conflict (when clinicians clearly described the sessions in detail and indicated that the siblings played cooperatively). We noted, in an open text format, any comments regarding the resolution of conflict. A “not indicated/unclear” options was used when not enough information was available for coding. Sibling play during part four of RFP, as well as play throughout the session, was coded using the following levels: yes, often; yes, sometimes; never; and not indicated/unclear.

**Whole family play**

In relation to part three of each RFP session, whole family play was coded if cooperative play involving all family members together occurred (as opposed to one parent or child being withdrawn/excluded, or parallel play among dyads). Coding levels included: yes, often; yes, sometimes; never; and not indicated/unclear. Clinicians consistently described the family’s ability to come together and play as a whole unit in their session notes. For example, a session note stating that while the family came together to play at some points during part three, they still engaged in parallel play would be coded as “yes, sometimes”. Another note reporting that a family came together nicely to play as a unit in part three would be coded as “yes, often”. Alternatively, a session note indicating that part three involved only parallel play, for example mom playing with one child and dad excluded or playing with a sibling, would be coded as “never”.

**Maintaining boundaries**

We coded how well parents maintained boundaries around the coparenting unit during part four of RFP. Coding levels were developed to capture if one or both parents had difficulties maintaining boundaries or if both parents maintained boundaries well. This variable considered what parents said as well as any mention of their nonverbal behaviour (e.g., parents sitting facing each other was considered a nonverbal cue to the child of a boundary in part four). If parents were interrupted by their child but were able to attend to the child briefly and then return to the task of engaging with each other, this was coded as favourable (i.e., yes, absolutely). Here we were looking for a clear but flexible boundary.

**Parental engagement**

Whether parents were engaged with each other during part four of each RFP session was coded as: yes, absolutely; yes, somewhat; never; not indicated/unclear. Like our coding of boundaries, parental engagement included a consideration of the verbal and nonverbal behaviour of parents during part four. Parents were coded as engaging (absolutely) when they discussed the play together throughout part four and were physically positioned in a way that showed they were attending to their coparenting partner (e.g., sitting near each other, facing or leaning into each other, making eye contact). If a clinician did not describe the parents’ behaviour but instead noted simply the parents engaged well, “yes, absolutely” was also selected. If parents talked for a short time, they were coded as engaging “somewhat”. Finally, if parents did not talk to each other during part four (often sitting facing away from each other, watching their child’s play without engaging with one another), “never” was assigned.

**Parental reflection**

Parental reflection was coded when parents talked about the session (i.e., their observations about the play and their child) during parts four and/or afterwards with the therapist. This discussion could include reflections about how the session related to experiences the family had outside of therapy. If parents reflected two or more times, the level of reflection for that session was coded as “yes, absolutely”. If parents reflected only a little, then “yes, somewhat” was selected. If no discussion of the session took place, reflection was coded as “never” occurring.

**Parental mentalization**

Mentalization was coded informally when parents tried to understand the behaviour and experience of their child or partner in terms of their internal world (i.e., feelings, needs, wants, fears etc.). Like parental reflection, the coding levels for mentalization included: yes, absolutely; yes, somewhat; never; not indicated/unclear. Both the frequency and quality of parents’ mentalizing attempts were considered. Frequent and appropriate mentalization was coded most favourably (“yes, absolutely”). If no mentalization occurred or if an attempt to mentalize was inappropriate (e.g., attributing malintent to a child’s normative play or behaviour) then “never” was chosen. If the quality of mentalization was poor (e.g., if a child is playing calmly on their own and the parent can only understand the meaning to be that the child does not need the parent), “yes, somewhat” was coded.

**Shifts in family alliance**

We examined if any shifts in the session-by-session variables described above occurred across therapy. To do this, we examined the coding of every RFP session. A shift was operationalized as a change in a particular variable that persisted for all or most of the remaining sessions. For example, if a family engaged in parallel play in part three of RFP for the first five sessions, but at session six engaged in whole family play, and continued to do so for the remaining three therapy sessions, this would be noted as a shift (or improvement) in whole family play. The session number when shifts occurred was noted as well .

**Treatment Response**

Information about changes in presenting concerns or the family alliance following RFP, as described in session and/or final feedback notes, was collected qualitatively (open text field). Parent-reported and clinician-observed improvements were then coded as yes, no, or not indicated/unclear. We coded for improvements in all presenting concerns coded earlier. Early in the data collection and coding process, the second author observed that several families noted improvements in the level of affection shared among family members and general cooperation. Thus, in addition to coding changes in presenting concerns (e.g., in sibling conflict, tantrums, aggression, etc.), we added increased affection and greater cooperation as an indicator of positive change within the family following treatment.

**Post-treatment plan**

Qualitative information about any plans for treatment following RFP (i.e., aftercare plans) were noted in an open text field. For example, we wanted to know if a family no longer needed support after RFP, or if additional services were required and recommended to the family.
